# Supplementary material
Source: PubMed Central journal article supplement (PMC2840266)
Supplement: NIHMS181664-supplement-01.pdf [file NIHMS181664-supplement-01.pdf]

**Sublethal Antibiotic Treatment Leads to Multidrug Resistance via Radical-Induced Mutagenesis**

Michael A. Kohanski, Mark A. DePristo and James J. Collins

**Supplemental Results**

**Bactericidal Antibiotics Lead to Low-Level Increases in MIC for a Range of Antibiotics**

Treatment with 25 ng/ml norfloxacin led to significant increases in the MIC for norfloxacin and kanamycin as well as modest, low-level increases in the MIC for ampicillin, tetracycline and chloramphenicol (Figure S1A). This increase in MIC for norfloxacin was concentration dependent. Treatment with 50 ng/ml norfloxacin led to a 6-fold increase in the MIC for norfloxacin (Figure S1B); however, we were unable to observe an increase in the MIC for ampicillin, kanamycin, tetracycline, or chloramphenicol following treatment with 50 ng/ml norfloxacin for 5 days (Figure S1B). Interestingly, selection of drug-resistant mutants following quinolone treatment is concentration dependent, with higher concentrations of quinolone selecting only quinolone-resistant strains and lower levels of quinolone selecting broadly for drug-resistant mutants with mutations in a wide array of targets in *E. coli* (Drlica, 2003) and *Mycobacterium tuberculosis* (Zhou et al., 2000). It is possible that treatment with 50 ng/ml norfloxacin selects for naturally occurring quinolone-resistant mutants before the drug-induced mutagenesis has a chance to create mutants resistant to other drugs.

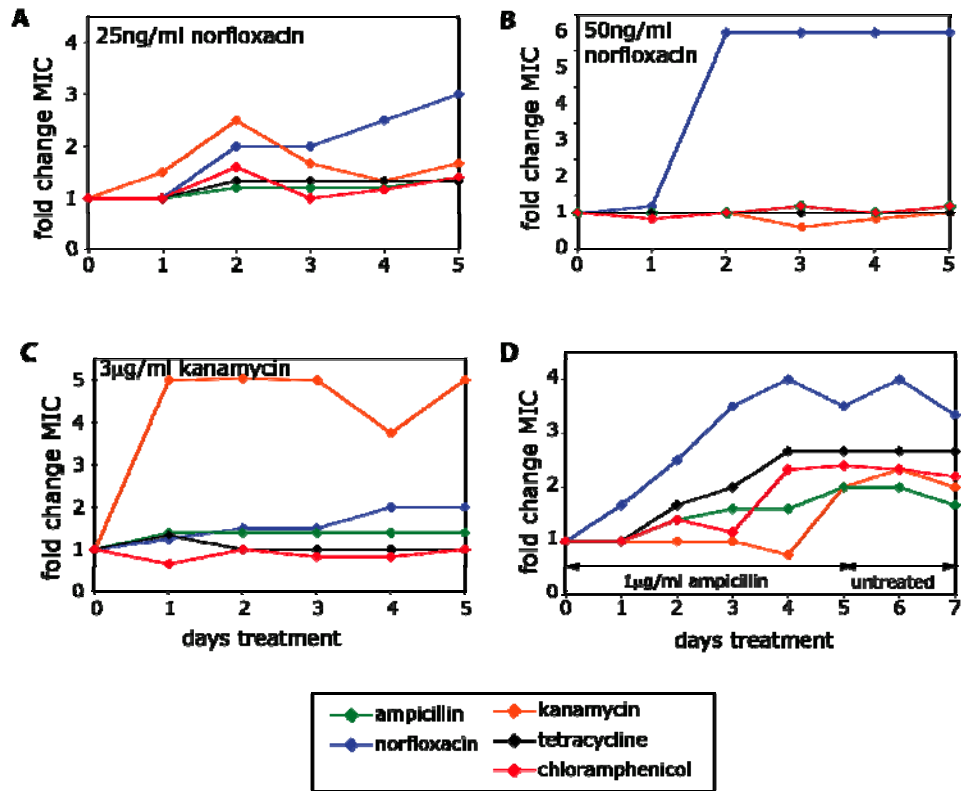

**Figure S1. Bactericidal Antibiotics Can Lead to Broad-Spectrum Increases in MIC**  
 (A-C) Fold change in MIC relative to a no-drug control for ampicillin, norfloxacin, kanamycin, tetracycline and chloramphenicol, following 5 days of growth in the presence of (A) 25ng/ml norfloxacin, (B) 50ng/ml norfloxacin, or (C) 1µg/ml kanamycin.  
 (D) Ampicillin-mediated increases in MIC are stable. Fold change in MIC relative to a no-drug control for ampicillin, norfloxacin, kanamycin, tetracycline and chloramphenicol, following 5 days of growth in the presence of 1µg/ml ampicillin and an additional 2 days of growth in the absence of drug.

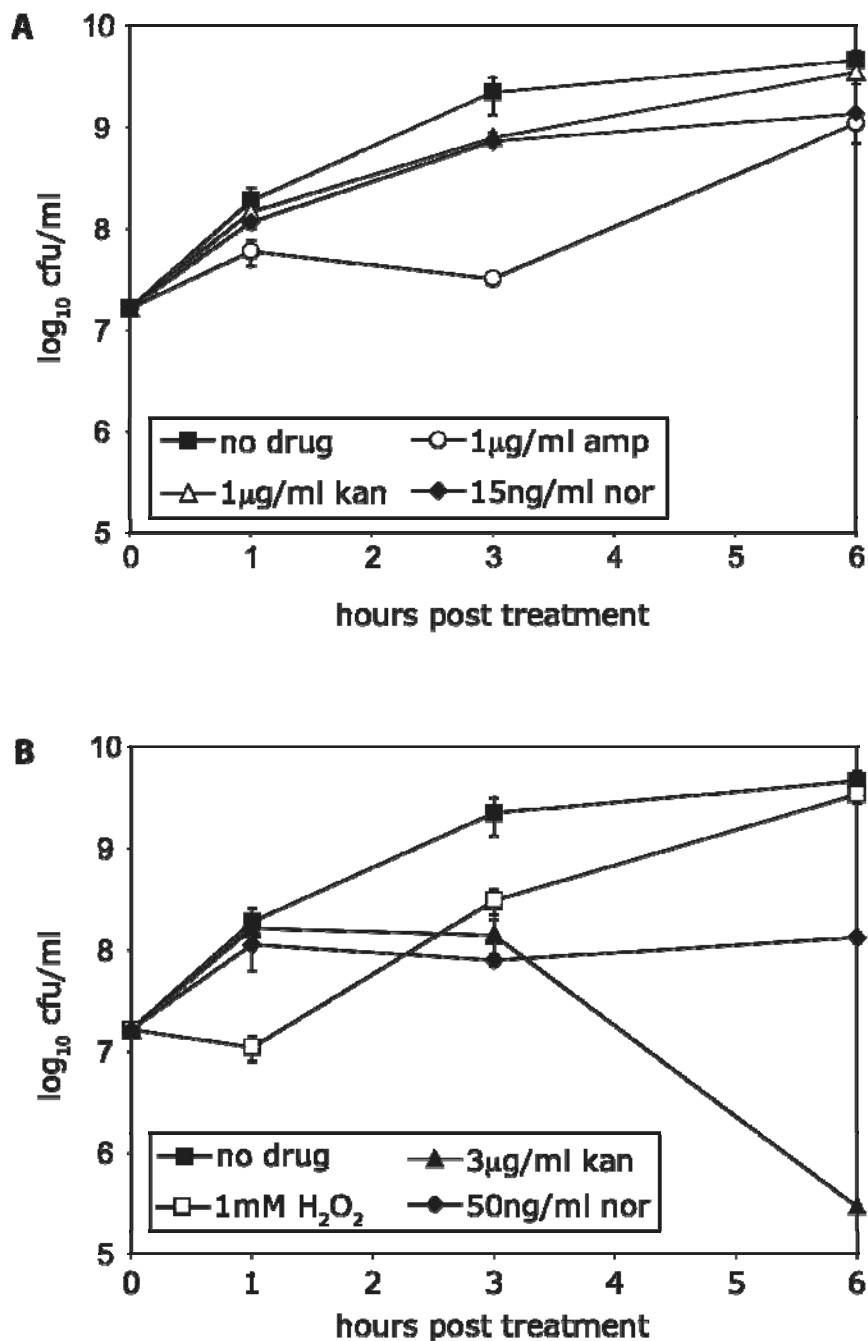

**Figure S2. Survival of *E. coli* Following Treatment with Near-MIC Levels of Antibiotics**

(A) Survival of MG1655 following treatment with no drug (filled squares), 1µg/ml ampicillin (amp, open circles), 1µg/ml kanamycin (kan, open triangles), and 15ng/ml norfloxacin (nor, filled diamonds), respectively. (B) Survival of MG1655 following treatment with no drug (filled squares), 3µg/ml kanamycin (filled triangles), 1mM hydrogen peroxide (H<sub>2</sub>O<sub>2</sub>, open squares), and 50ng/ml norfloxacin (filled diamonds), respectively.

**Table S1. PCR Primers and Sequencing Primers**

| <b>PCR Primers</b>        |                                         |
|---------------------------|-----------------------------------------|
| <b>Primer Name</b>        | <b>Sequence (5'-3')</b>                 |
| gyrA-F                    | CCA GAC TTT GCA GCC TGG ACT T           |
| gyrA-R                    | AAC TCA CCT TCC AGA TCC CAC CA          |
| gyrB-F                    | TGA ACG CCT TAT CCG GCC TAC AA          |
| gyrB-R                    | CTC TGA GCT TGA TGA TGA GCG TCG         |
| tolC-F                    | TGA CTG CCG TTT GAG CAG TCA TGT G       |
| tolC-R                    | TTA CGT TGC CTT ACG TTC AGA CGG         |
| marRA-F                   | TAG CTA ACG GCA GCA ACA CCA C           |
| marRA-R                   | CAA TGT ATT TGG CTT GCG GTG GC          |
| acrAB-F                   | TCG TAT GAG ATC CTG AGT TGG TGG TTC     |
| acrAB-R                   | AAT GCC AGT AGA TTG CAC CGC             |
| acrAB-F2                  | ACT TAT TAC TAC GCG ATC GCC TGC T       |
| acrAB-R2                  | GCA GTG AAC CAG AAT AGC AAC GAC GA      |
| sdhB-F                    | CTG CCA ACT TCC GTA CCG AAA G           |
| sdhB-R                    | AGC TCT TGT CTA CGT AGT GGC TC          |
| icdA-F                    | CTG GTA GAA CGT TGC GAG CT              |
| icdA-R                    | GAC TAG TAG TAG AAC TAC CAC CTG ACC G   |
| iscR-F                    | GTT ACC AAA GGT TCC GTC CAT CGT         |
| iscR-R                    | CGT CTT ATC AGG CCT ACA GTG TAC AG      |
| cpxR-F                    | CGA CAT GCT GCT CAA TCA TCA GC          |
| cpxR-R                    | GCT TAA TGA ACT GAC TGC CAG CGT TGA     |
| arcA-F                    | GAC TGC TCA ACT CTG CCG ATA G           |
| arcA-R                    | TGC TGT TAA AAT GGT TAG GAT GAC AGC CGT |
| ampC-F                    | AGG CAA CGA CCA GAA ATG CAG CT          |
| ampC-R                    | TAT GCA CCA CGC GAT GCA CGA T           |
|                           |                                         |
| <b>Sequencing Primers</b> |                                         |
| <b>Primer Name</b>        | <b>Sequence (5'-3')</b>                 |
| gyrA1                     | CAG GCA TTG GAT GTG AAT AAA GCG TAT AGG |
| gyrA2                     | ATC ATT AAC GGT CGT CGC GGT ATT G       |
| gyrA3                     | TGC GTG ATG GTC TGT ACT ACC TGA         |
| gyrA4                     | TCC TCA CCG AGT TCA ACC GTC T           |
| gyrB1                     | TCA GTG CTG AAC ACG TTA TAG ACA TGT CGG |
| gyrB2                     | GAC GGC AAA GAA GAC CAC TTC CAC T       |
| gyrB3                     | AAG CGC GCT TCG ATA AGA TGC T           |
| gyrB4                     | GTT TGA TGT TCA CAC CAA TGC TGA GC      |
| tolC1                     | TAT GGC ACG TAA CGC CAA CCT             |
| tolC2                     | TAA CCT TGA TAA CGC GGT AGA GCA GC      |
| tolC3                     | GCT CAA GCG TGC CTG TAA CA              |
| marRA1                    | AGC TAG CCT TGC ATC GCA TTG A           |

|          |                                        |
|----------|----------------------------------------|
| marRA2   | CGG ACG AAG TGG CAA CAC TTG AGT AT     |
| marRA-M1 | AGG TAT GAC GAT GTC CAG ACG CA         |
| marRA-M2 | TGC GTC TGG ACA TCG TCA TAC CT         |
| acrA1    | CAG CTG CTT TTG CAA TCT CGC            |
| acrA2    | CTG CTC GGT ACT CAG TAC ATC AGT AAG C  |
| acrA3    | TGC AGA AAG TGC GTC CTG GTG T          |
| acrA4    | ATT ACC GCC ATC AAA GCG CAG            |
| acrA8    | CTC CAT CAA TAA TCG ACG CCG TTC T      |
| acrA9    | TGT AAG CCA GAT TGA TCC GCG CA         |
| acrA-M1  | GTT CTG TAC CAA TGC GCC TTC CGT        |
| acrA-M2  | ACG GAA GGC GCA TTG GTA CAG AAC        |
| icdA1    | TAG CCT AAT AAC GCG CAT CTT TCA TGA CG |
| icdA2    | ATT CGC TTC CCG GAA CAT TGT GGT A      |
| icdA3    | CTA CCC CAA AAC TAC CGA GGG GTT        |
| icdA4    | CCA GTC TTT AAA CGC TCC TTC GGT        |
| icdA-R5  | GGA GCG TTA CGC TCC CGT TAA TA         |
| icdA-M1  | GGT ATC GAA TGG AAA GCA GAC TCT GC     |
| sdhB1    | TCG ACT TCC CGG ATC GTG ATG ATG A      |
| sdhB2    | TTC TTT GTT ACG CCT GAT GCG CT         |
| iscR1    | TGG GTT GCG GAG TAG TCG AGA TAA        |
| iscR2    | ATA TGG CGT TCA CGC CGC AT             |
| cpxR1    | ACG CTG TTC GCT ATC CAG AAG CTC        |
| cpxR2    | GCA GCG GTA ACT ATG CGC ATC ATT        |
| arcA1    | GTG ACC CGT AAT ATC GAC TGG TAT GC     |
| arcA2    | GTA CCC ACG ACC AAG CTA ATG ATG        |
| ampC1    | TGG CTG CTA TCC TGA CAG TTG TCA        |
| ampC2    | GTC TGT ATG CCA ACT CCA GTA TCG GT     |

## Supplemental References

Drlica, K. (2003). The mutant selection window and antimicrobial resistance. *J Antimicrob Chemother* 52, 11-17.

Zhou, J., Dong, Y., Zhao, X., Lee, S., Amin, A., Ramaswamy, S., Domagala, J., Musser, J.M., and Drlica, K. (2000). Selection of antibiotic-resistant bacterial mutants: allelic diversity among fluoroquinolone-resistant mutations. *J Infect Dis* 182, 517-525.
